# Supplementary material
Source: PubMed Central journal article supplement (PMC4433796)
Supplement: NIHMS677964-supplement-1.pdf [file NIHMS677964-supplement-1.pdf]

Figure S1

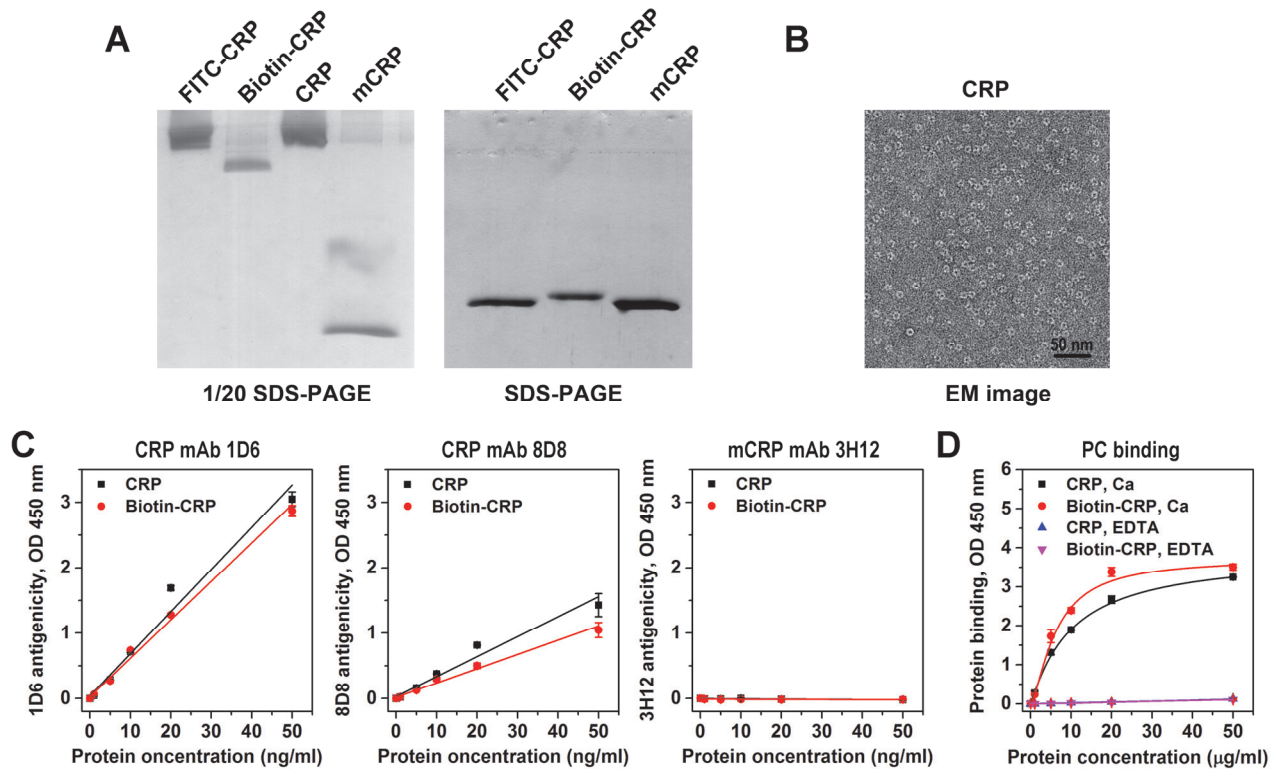

**Figure S1. Native structure and normal antigenicity of CRP is preserved after labeling with FITC and biotin.** Human CRP, FITC-CRP, and biotin-CRP all migrated in 1/20 SDS-PAGE as large molecular weight pentamers (1) and in regular SDS-PAGE as monomers (A; mCRP denotes monomeric CRP). (B) By electron-microscopy the pentameric structure of CRP was confirmed. (C) In sandwich ELISAs (2) mAbs 1D6 and 8D8 that recognize native CRP (3) also recognized biotin-CRP, whereas mAb 3H12 against a neo-CRP antigen (3) did not. (D) Both CRP and biotin-CRP bound to immobilized PC-BSA in a calcium-dependent manner.

## Figure S2

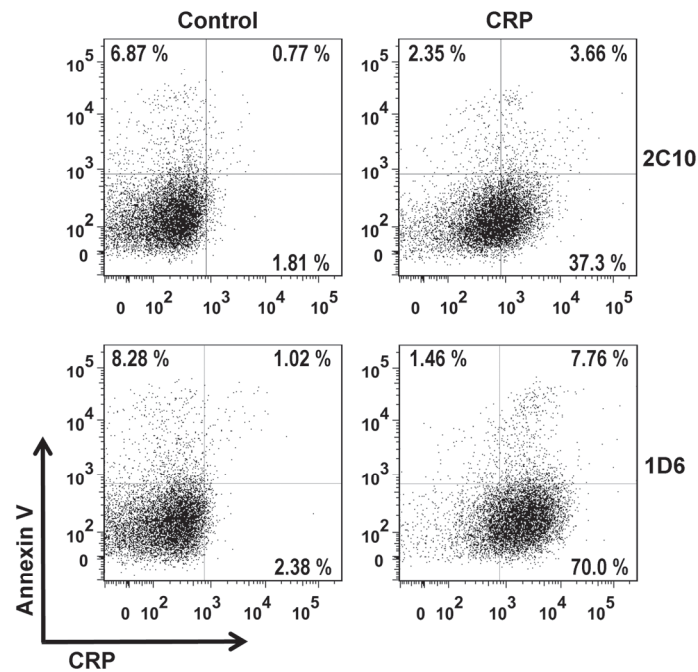

**Figure S2. Binding of native CRP to live Jurkat T cells.** Based on its detection with mAb 1D6 that recognizes native CRP (3), the majority of human CRP (100  $\mu\text{g/ml}$ ) was bound to Annexin V-negative cells ( $66.4 \pm 1.6$  % of cells vs.  $1.3 \pm 0.1$  % of control cells not exposed to CRP,  $p < 0.001$ ).

## Figure S3

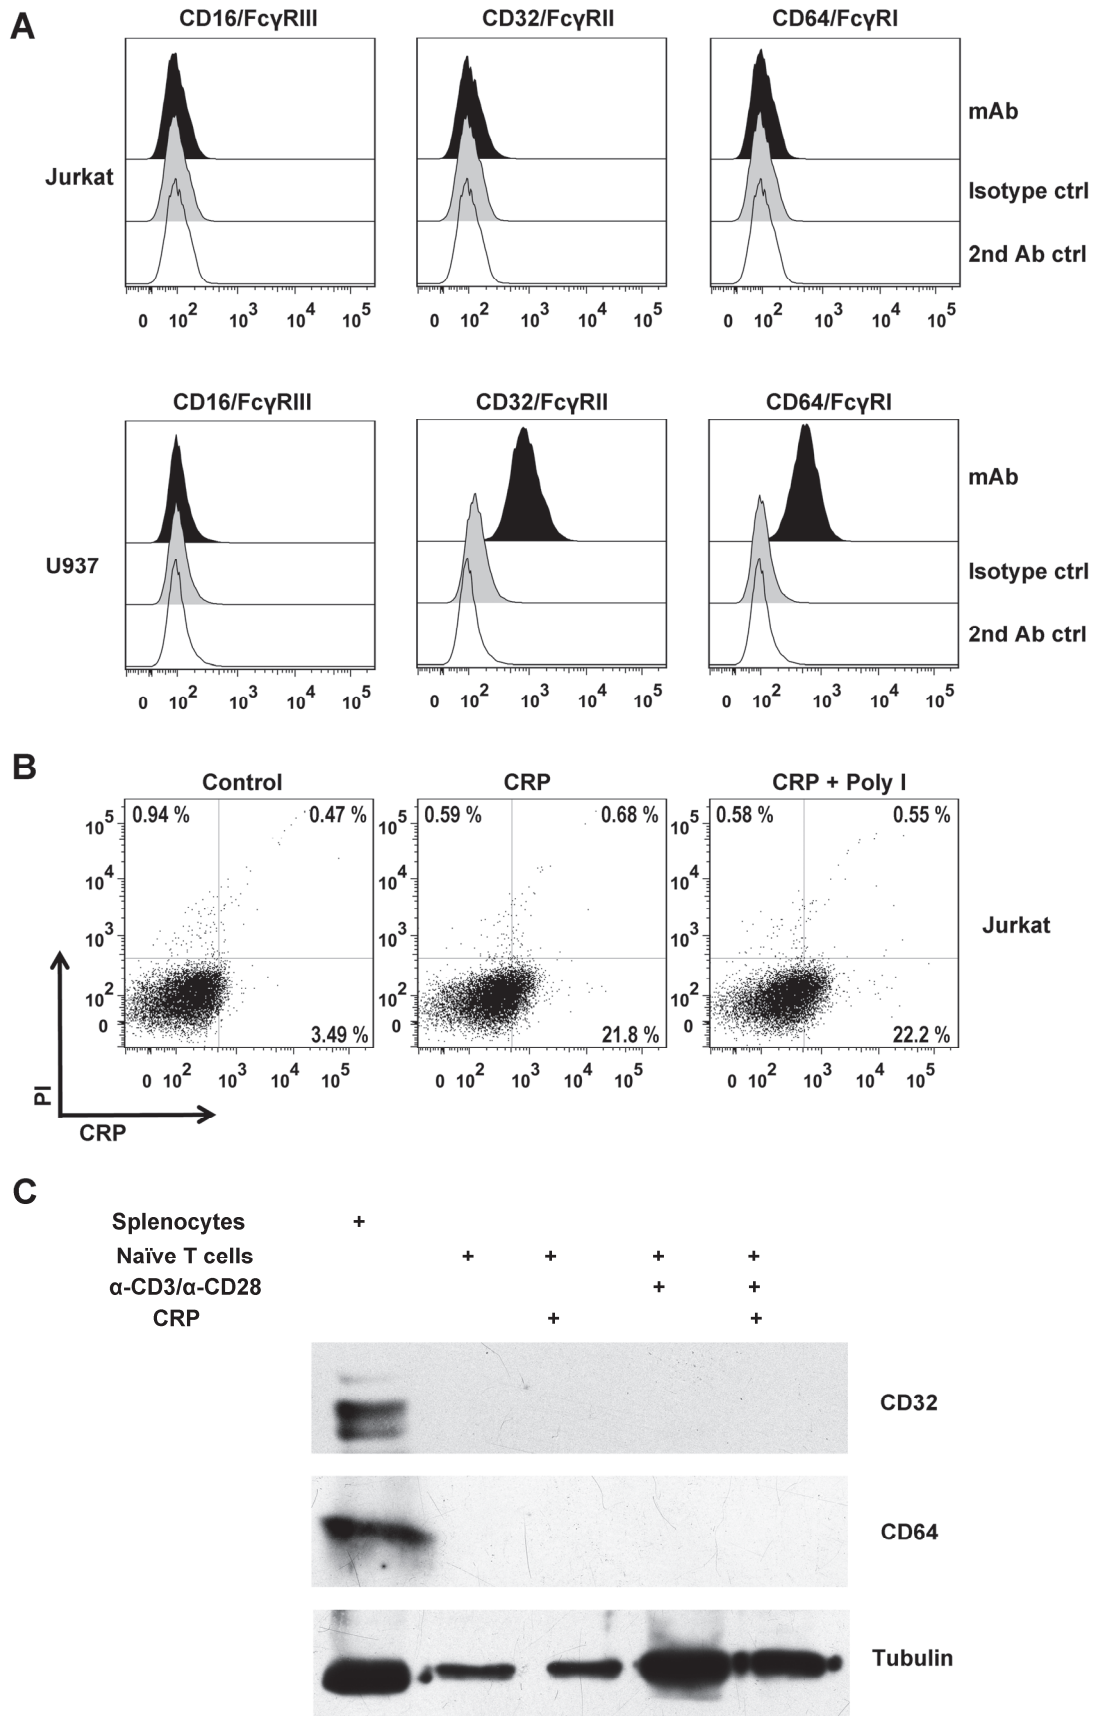

**Figure S3. Binding of CRP to human Jurkat and mouse naïve T cells does not require FcγRs nor LOX-1. (A)** No expression of CD16 (FcγRIII), CD32 (FcγRII) and CD64 (FcγRI) by Jurkat

---

(human) T cells could be seen by flow cytometry. In contrast, U937 (human) monocytic cells showed robust expression of CD32 and CD64. **(B)** Polyinosinic acid (Poly I, 100 µg/ml), an inhibitor of LOX-1 (4), is unable to inhibit the binding of human CRP (100 µg/ml) to live Jurkat cells. Of note, the lack of LOX-1 expression on mouse CD3<sup>+</sup> T cells has also been demonstrated (5). **(C)** Mixed splenocytes or purified mouse naïve T cells were left untreated or activated with anti-CD3/anti-CD28, human CRP, or both for 24 h. Immunoblotting reveals no signal for CD32 and CD64 proteins in naïve T cells.

## Figure S4

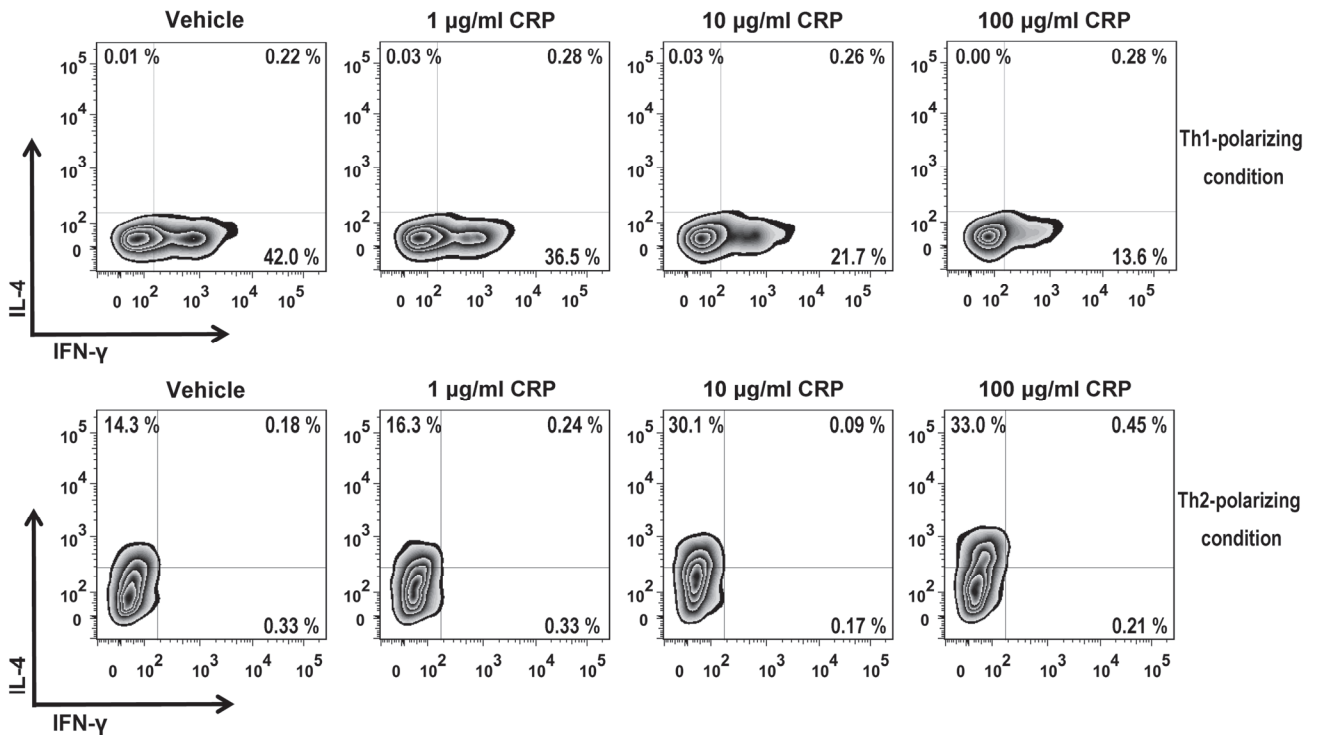

**Figure S4. CRP concentration-dependent modulation of Th1/Th2 differentiation.**  $2 \times 10^5$  naïve T cells were cultured for 3 days with anti-CD3/anti-CD28 mAbs under Th1 polarizing conditions (10 ng/ml mIL-2, 20 ng/ml mIL-12p70, 10 µg/ml anti-IL-4 mAb) or Th2 polarizing conditions (10 ng/ml mIL-2, 20 ng/ml mIL-4, 10 µg/ml anti-IL12 mAb, 10 µg/ml anti-IFN-γ mAb). Human CRP at the indicated concentrations was added to cells 24 h after the beginning of cell differentiation (late treatment as described for Figure 4).

## References

1. Taylor, K. E., and C. W. van den Berg. 2007. Structural and functional comparison of native pentameric, denatured monomeric and biotinylated C-reactive protein. *Immunology* 120: 404-411.
2. Ji, S. R., Y. Wu, L. Zhu, L. A. Potempa, F. L. Sheng, W. Lu, and J. Zhao. 2007. Cell membranes and liposomes dissociate C-reactive protein (CRP) to form a new, biologically active structural intermediate: mCRP(m). *FASEB J* 21: 284-294.
3. Ying, S. C., H. Gewurz, C. M. Kinoshita, L. A. Potempa, and J. N. Siegel. 1989. Identification and partial characterization of multiple native and neoantigenic epitopes of human C-reactive protein by using monoclonal antibodies. *J Immunol* 143: 221-228.
4. Moriwaki, H., N. Kume, T. Sawamura, T. Aoyama, H. Hoshikawa, H. Ochi, E. Nishi, T. Masaki, and T. Kita. 1998. Ligand specificity of LOX-1, a novel endothelial receptor for oxidized low density lipoprotein. *Arterioscler Thromb Vasc Biol* 18: 1541-1547.
5. Li, D., G. Romain, A. L. Flamar, D. Duluc, M. Dullaers, X. H. Li, S. Zurawski, N. Bosquet, A. K. Palucka, R. Le Grand, A. O'Garra, G. Zurawski, J. Banachereau, and S. Oh. 2012. Targeting self- and foreign antigens to dendritic cells via DC-ASGPR generates IL-10-producing suppressive CD4+ T cells. *J Exp Med* 209: 109-121.
